# Supplementary material
Source: PubMed Central journal article supplement (PMC3399476)
Supplement: cn1000217_si_001.pdf [file cn1000217_si_001.pdf]

Supplementary Table S1.

| <b>a</b> | ALA1  | ALA2  | ALA3  | ALA4  | ALA5  | ALA6  | ALA7  | ALA8  | ALA9  | RID1  | RID2  | RID3  | RID4  | RID5  | RID6  | RID7  | RID8  | RID9  | RID10 | RID11 |
|----------|-------|-------|-------|-------|-------|-------|-------|-------|-------|-------|-------|-------|-------|-------|-------|-------|-------|-------|-------|-------|
|          |       |       |       |       |       |       |       | 800.7 |       | 800.5 |       |       | 800.7 |       | 800.7 | 800.8 |       | 800.8 |       |       |
|          | 806.2 |       | 806.0 | 806.0 |       |       |       |       |       |       |       | 806.1 | 806.2 | 806.1 |       |       |       |       |       |       |
| AF25     |       |       |       |       |       |       | 809.4 | 809.5 |       |       |       |       |       |       |       |       |       |       |       |       |
|          | 810.7 | 810.8 | 810.5 |       |       |       |       | 810.6 | 810.7 | 810.4 |       |       | 810.7 |       | 810.8 |       |       | 810.7 |       |       |
|          |       |       |       |       |       |       |       | 812.7 |       |       |       |       |       |       |       |       |       |       |       |       |
|          | 814.7 |       |       |       |       |       |       | 814.7 |       |       |       |       |       |       |       |       |       |       |       |       |
|          |       |       |       |       |       |       |       |       |       |       | 819.0 |       |       |       |       |       |       |       |       |       |
|          |       |       |       |       |       |       |       |       |       |       | 833.0 |       |       |       |       |       |       |       | 833.0 |       |
|          |       |       |       |       |       |       |       |       |       |       |       |       |       |       |       |       |       |       | 841.0 | 841.2 |
|          |       |       |       |       |       |       |       |       |       |       |       | 844.0 |       |       |       |       |       |       |       |       |
|          |       |       |       |       |       |       |       |       |       |       |       | 849.0 |       |       |       |       |       |       |       |       |
|          |       |       |       |       |       |       |       |       |       |       |       |       |       |       | 850.1 |       |       |       |       |       |
|          |       |       |       |       |       |       |       |       |       |       | 855.0 |       |       |       |       |       |       |       | 855.0 |       |
|          | 856.1 |       | 856.0 | 856.0 |       | 856.0 |       | 856.1 |       |       |       | 856.1 | 856.1 | 856.1 |       |       |       |       |       |       |
| AF3##    | 857.4 |       |       |       |       | 857.3 |       |       |       | 857.4 | 857.5 | 857.6 | 857.6 | 857.6 | 857.6 | 857.7 | 857.7 | 857.7 | 857.5 | 857.7 |
|          | 860.1 |       |       | 859.9 |       | 860.0 |       |       |       |       | 859.9 | 860.1 | 860.1 |       |       |       |       |       | 859.9 |       |
|          |       |       |       |       |       |       | 861.1 | 861.2 |       |       |       |       |       |       |       |       |       |       |       | 861.2 |
|          |       |       |       |       |       |       | 862.6 | 862.8 |       |       |       |       |       |       |       |       |       |       |       |       |
|          | 865.1 | 865.2 |       |       | 865.1 |       |       |       |       |       | 865.0 | 865.0 |       |       | 865.1 |       |       |       |       |       |
|          |       |       |       |       |       |       |       |       |       |       |       |       |       |       | 866.1 |       |       |       | 866.0 |       |
|          |       |       |       |       |       |       |       |       |       |       | 871.0 |       |       |       |       |       |       |       | 871.0 |       |
|          | 873.1 |       |       |       |       |       |       | 873.1 |       |       |       |       |       |       |       |       |       |       |       |       |
| AF20##   |       |       |       |       |       |       |       |       |       | 875.3 | 875.4 | 875.5 | 875.5 | 875.5 | 875.5 | 875.6 | 875.7 | 875.6 | 875.4 |       |
|          |       |       |       |       | 875.6 |       |       |       |       |       |       |       |       |       | 877.1 |       |       |       | 877.0 | 877.2 |
|          |       |       |       |       |       | 877.0 |       | 877.2 |       |       |       |       |       |       | 882.0 |       |       |       | 881.9 |       |
|          |       |       |       | 881.1 |       |       |       |       |       |       | 886.9 |       |       |       |       |       |       |       | 886.9 |       |
|          |       |       |       | 887.1 |       | 886.6 |       | 887.1 |       |       |       |       |       |       |       |       |       |       |       |       |
|          |       |       |       |       |       |       |       |       |       |       | 891.4 | 891.5 | 891.5 | 891.5 | 891.5 | 891.6 | 891.7 |       |       |       |
|          |       |       |       |       |       |       |       |       |       |       |       |       |       |       | 893.1 |       |       | 893.1 | 893.0 | 893.2 |
| AF8#     | 901.5 | 901.6 | 901.4 | 901.4 | 901.6 | 901.4 | 901.5 | 901.5 | 901.6 |       |       |       |       |       |       |       |       |       |       |       |
| AF14##   |       |       |       |       |       |       |       |       |       | 905.3 | 905.4 | 905.5 | 905.6 | 905.5 | 905.7 | 905.6 | 905.7 | 905.6 | 905.4 |       |
|          |       |       |       |       |       |       |       | 909.5 | 909.6 |       |       |       |       |       |       |       |       |       |       |       |
| AF8+O    | 917.5 | 917.6 | 917.4 | 917.4 | 917.6 | 917.4 | 917.5 | 917.5 | 917.6 |       |       |       |       |       |       |       |       |       |       |       |
| AF26/41  |       |       |       |       |       | 920.5 | 920.5 | 920.6 | 920.7 |       |       |       |       |       |       |       |       |       |       |       |
|          |       |       |       |       |       |       |       |       |       |       | 921.4 | 921.5 |       | 921.5 | 921.5 | 921.6 | 921.7 |       |       |       |
| AF8+Na   |       |       |       |       | 923.6 | 923.4 | 923.5 |       | 923.6 |       |       |       |       |       |       |       |       |       |       |       |
|          |       |       |       |       | 927.0 | 926.9 |       |       |       |       |       |       |       |       |       |       |       |       |       |       |
|          |       |       |       |       |       |       | 929.4 | 929.4 |       |       |       |       |       |       |       |       |       |       |       |       |
|          |       |       |       |       |       |       |       |       |       | 933.3 |       |       | 933.5 | 933.5 |       | 933.6 |       |       |       |       |
|          |       |       |       |       |       | 939.4 | 939.4 |       | 939.6 |       |       |       |       |       |       |       |       |       |       |       |
| AF4##    |       |       |       |       |       |       |       |       |       | 958.4 | 958.5 | 958.6 | 958.6 | 958.6 | 958.6 | 958.7 | 958.7 | 958.7 | 958.5 |       |
| AF8G     | 959.5 |       |       |       | 959.6 |       | 959.5 | 959.5 | 959.6 |       |       |       |       |       |       |       |       |       |       |       |
| AF8+Cu   |       |       | 963.4 | 963.3 |       | 963.3 |       | 963.4 |       |       |       |       |       |       | 963.6 |       |       |       |       |       |
|          |       |       |       |       |       |       |       |       |       | 972.3 |       |       |       |       | 972.5 |       | 972.6 |       |       |       |
|          |       |       |       |       |       |       |       | 975.5 | 975.6 |       |       |       |       |       |       |       |       |       |       |       |
|          |       |       |       |       |       |       |       |       |       | 976.5 | 976.7 |       | 976.7 | 976.7 |       | 976.7 |       | 976.8 | 976.5 |       |
|          |       |       |       |       |       |       |       |       |       |       |       |       |       |       | 981.6 |       | 981.7 |       |       |       |
| AF2##    |       |       |       |       |       |       |       |       |       | 991.4 | 991.5 | 991.6 | 991.6 | 991.6 | 991.6 | 991.7 | 991.7 | 991.7 | 991.5 | 991.7 |





**b**

|               |
|---------------|
| 810.7         |
| 856.0         |
| 857.5-AF3##   |
| 875.5         |
| 891.5         |
| 901.5-AF8#    |
| 905.6-AF14##  |
| 917.5-AF8+O   |
| 921.5         |
| 958.6-AF4##   |
| 959.5-AF8G    |
| 976.7         |
| 991.6-AF2##   |
| 1013.6        |
| 1020.6-AF13## |
| 1029.6        |
| 1036.6        |
| 1044.0        |
| 1045.5        |
| 1049.6-AF2G   |
| 1053.5        |
| 1080.6        |
| 1095.6        |
| 1152.6        |
| 1188.7-AF19#  |
| 1236.7-AF36#  |
| 1300.0        |
| 1333.8-AF34#  |
| 1339.7        |
| 1349.7        |
| 1374.7-PepTT# |
| 1383.7        |
| 1411.7        |
| 1425.7        |
| 1441.7        |
| 1453.8        |
| 1460.7        |
| 1464.7        |
| 1485.9-AF3*   |
| 1541.8-AF10## |
| 1544.8-PepTL# |
| 1578.9        |
| 1584.8        |
| 1607.9        |
| 1612.7        |
| 1698.8        |
| 1816.0-AF35#  |
| 2023.0-PepGE# |
| 2870.8        |

Supplementary Table S1. Comparisons of peaks from ALA and RID. (a) Peak lists from 9 ALA cells (orange) and 11 RID cells (blue) with no modifications. Relative peak height is indicated by 3 intensities of color; the highest intensity peaks are indicated by the darkest colors, and lowest intensity peaks are indicated by the lightest colors. (b) Direct comparison of peaks from ALA and RID. Orange indicates a peak found in a majority of ALA spectra. Blue indicates a peak found in a majority of RID spectra. Green indicates a peak found in a majority of both ALA and RID spectra. #, sequenced by MS/MS in RID; ##, sequenced by MS/MS in ALA; G, nonamidated form; o, oxygen; Na, sodium; Cu, copper; \*, extended form of peptide.

Supplementary Figure S2.

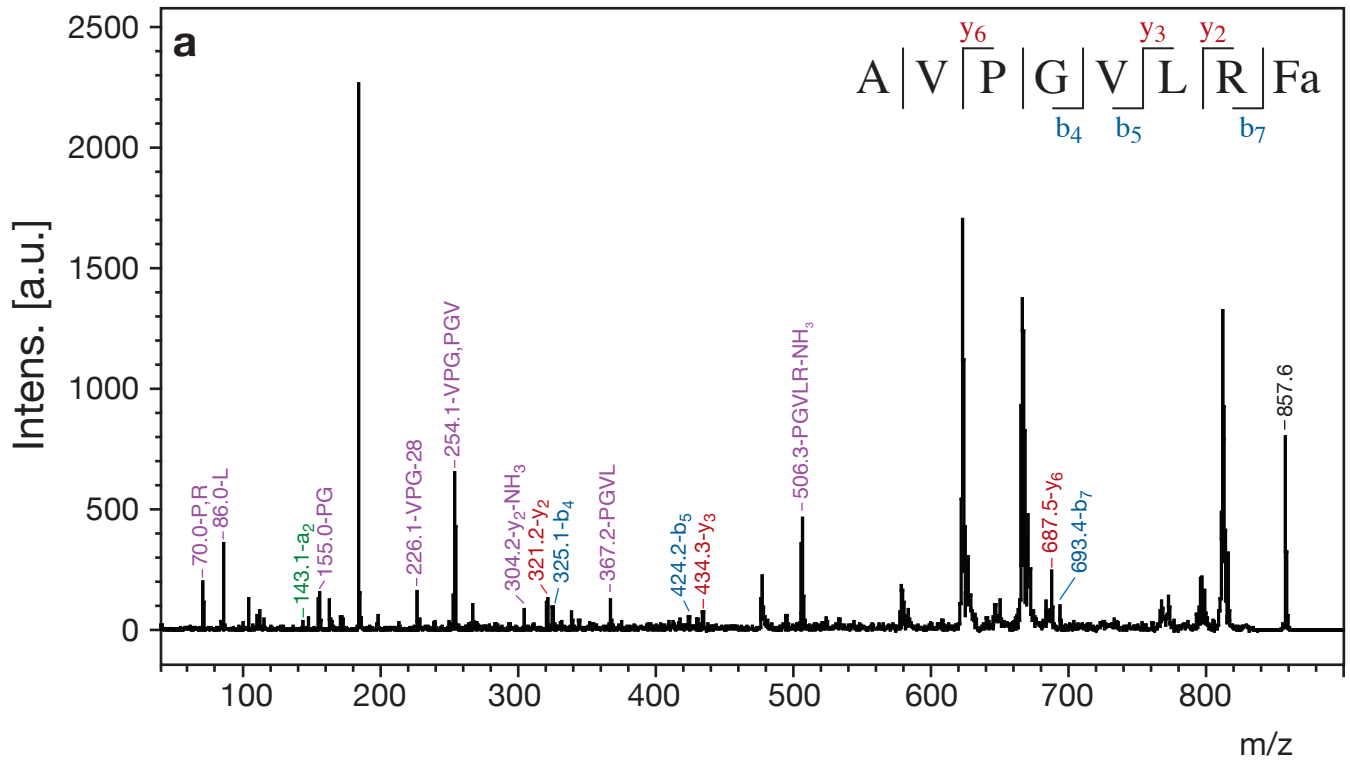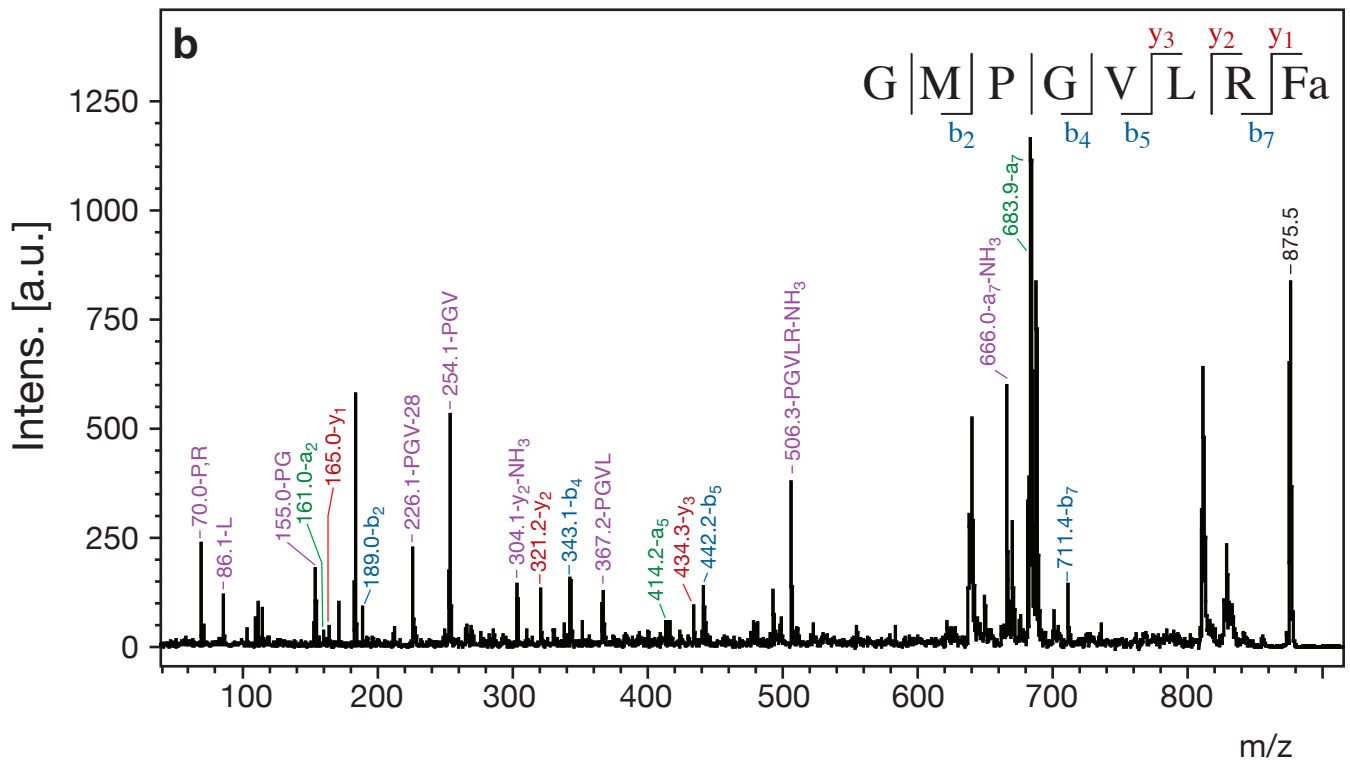

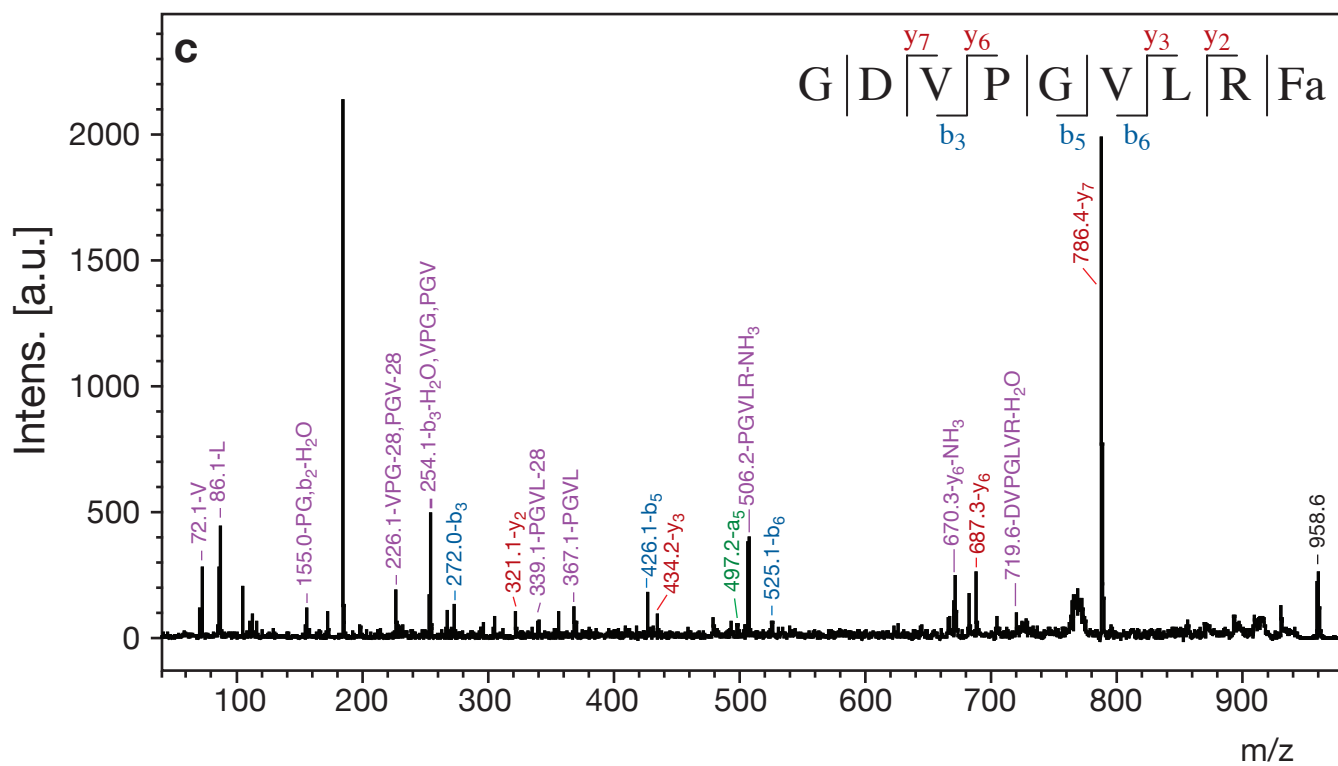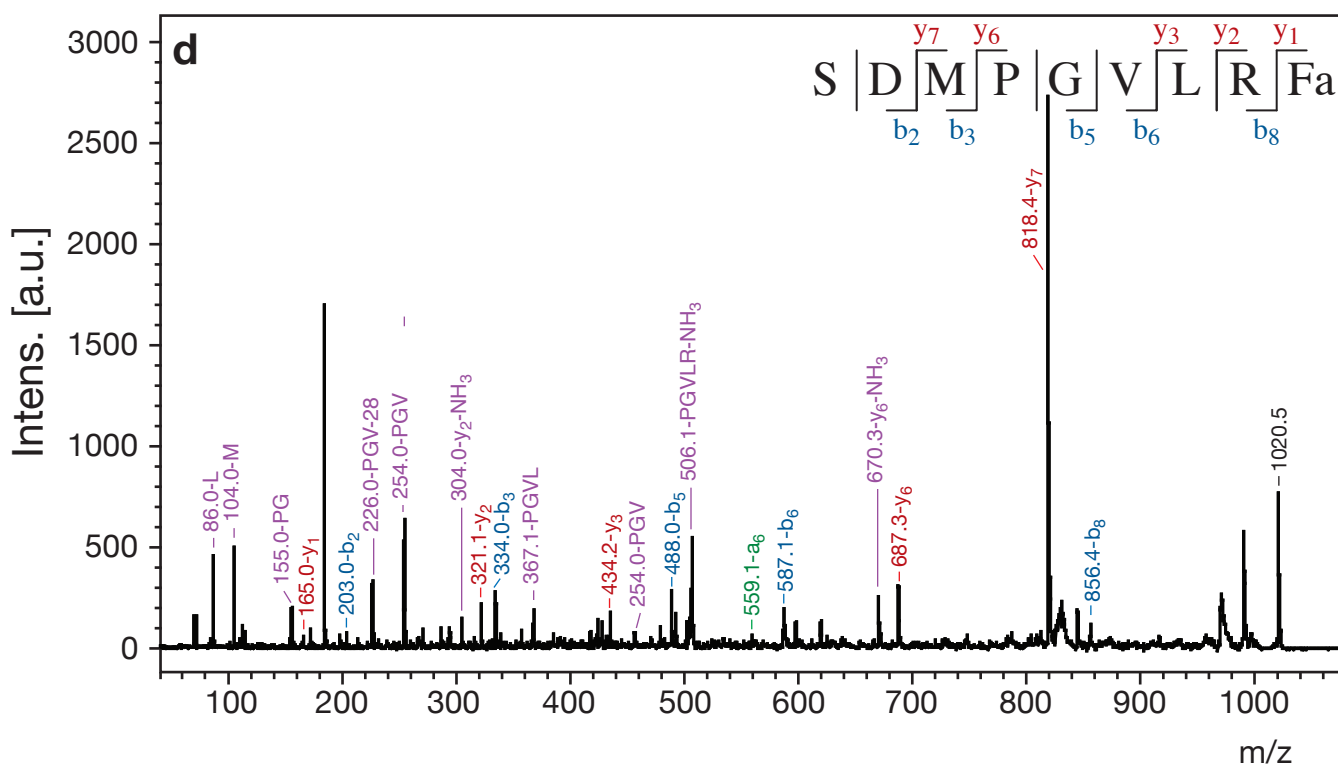

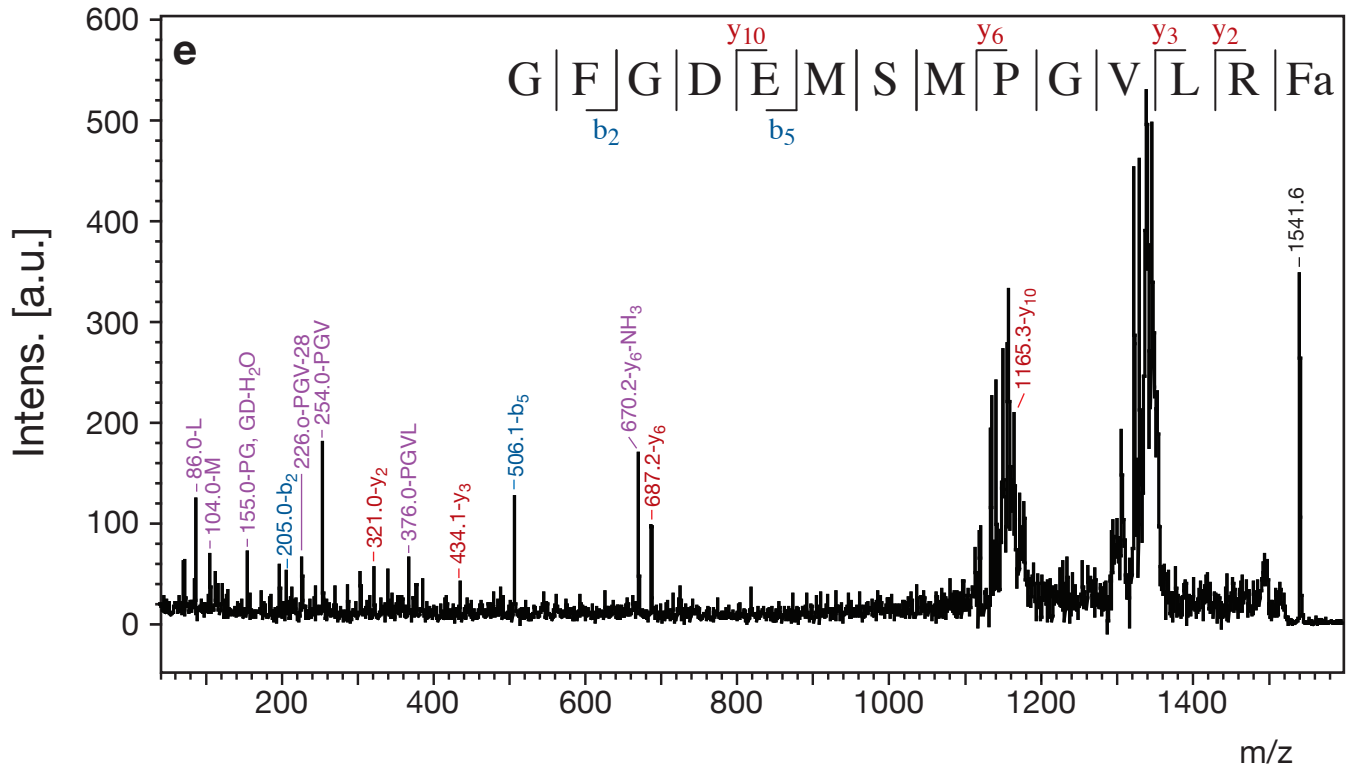

Supplementary Figure S2. MS/MS from RID of 5 *afp-1* peptides (see also Figure 3). Peaks representing a (green), b (blue), y (red), and high intensity internal fragment (purple) ions are labeled and b and y ions are summarized at the top of each spectrum. (a) MS/MS spectrum of AF3, m/z 857.6. (b) MS/MS spectrum of AF20, m/z 875.5. (c) MS/MS spectrum of AF4, m/z 958.6. (d) MS/MS spectrum of AF13, m/z 1020.6. (e) MS/MS spectrum of AF10, m/z 1541.6.

Supplementary Figure S3.

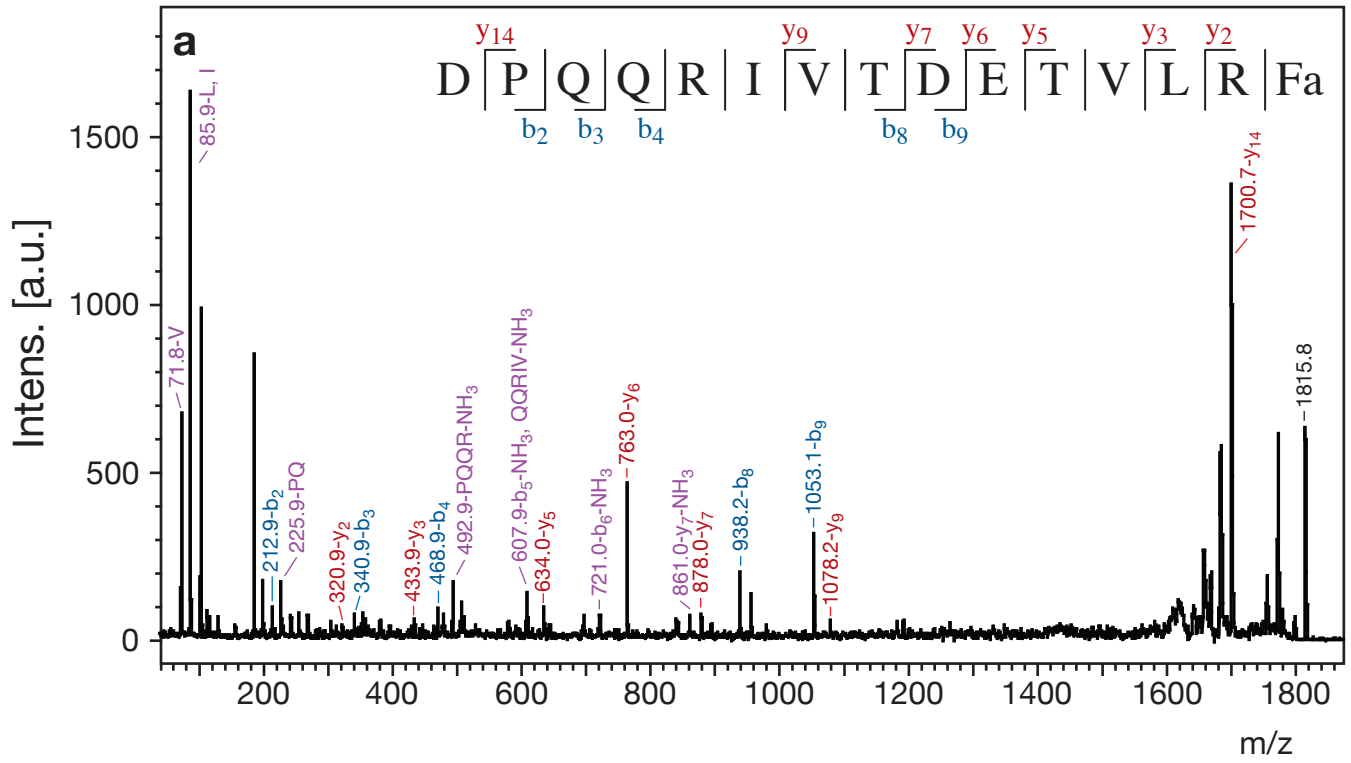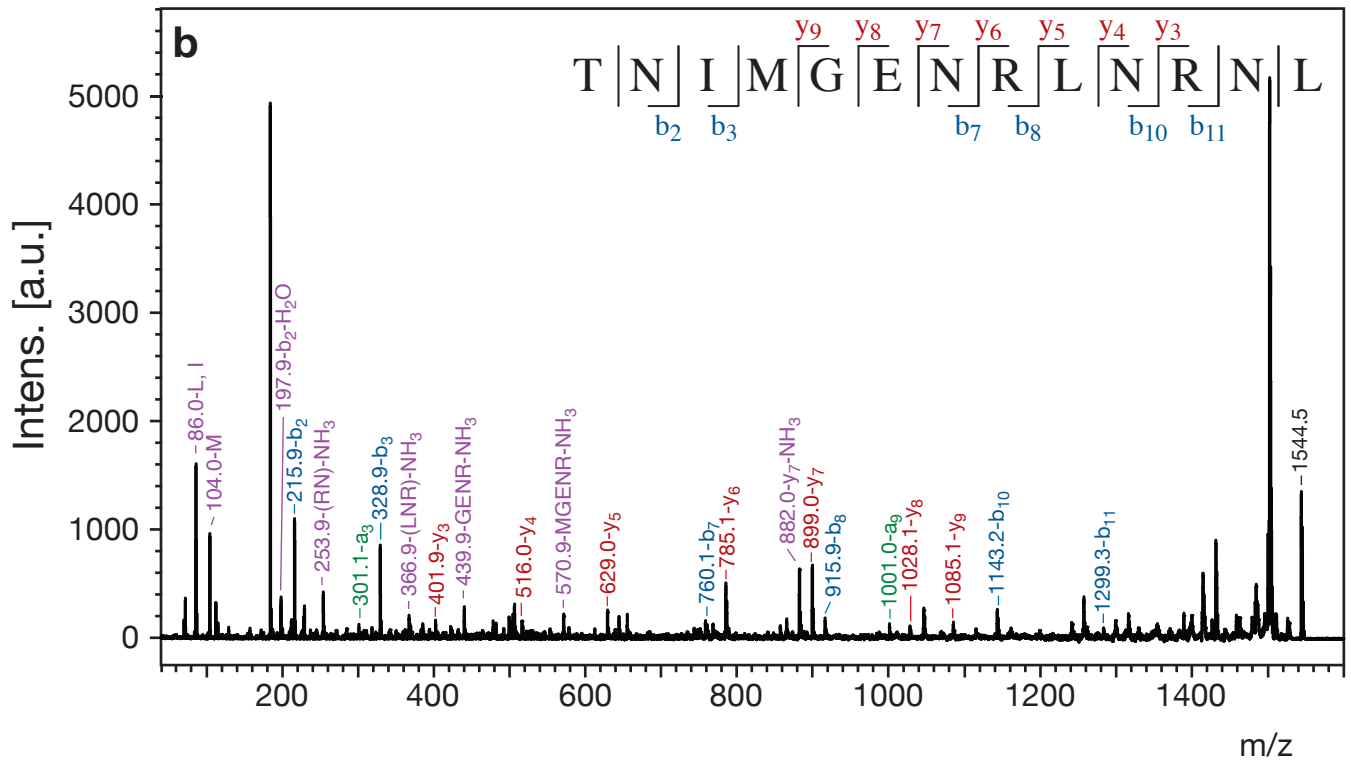



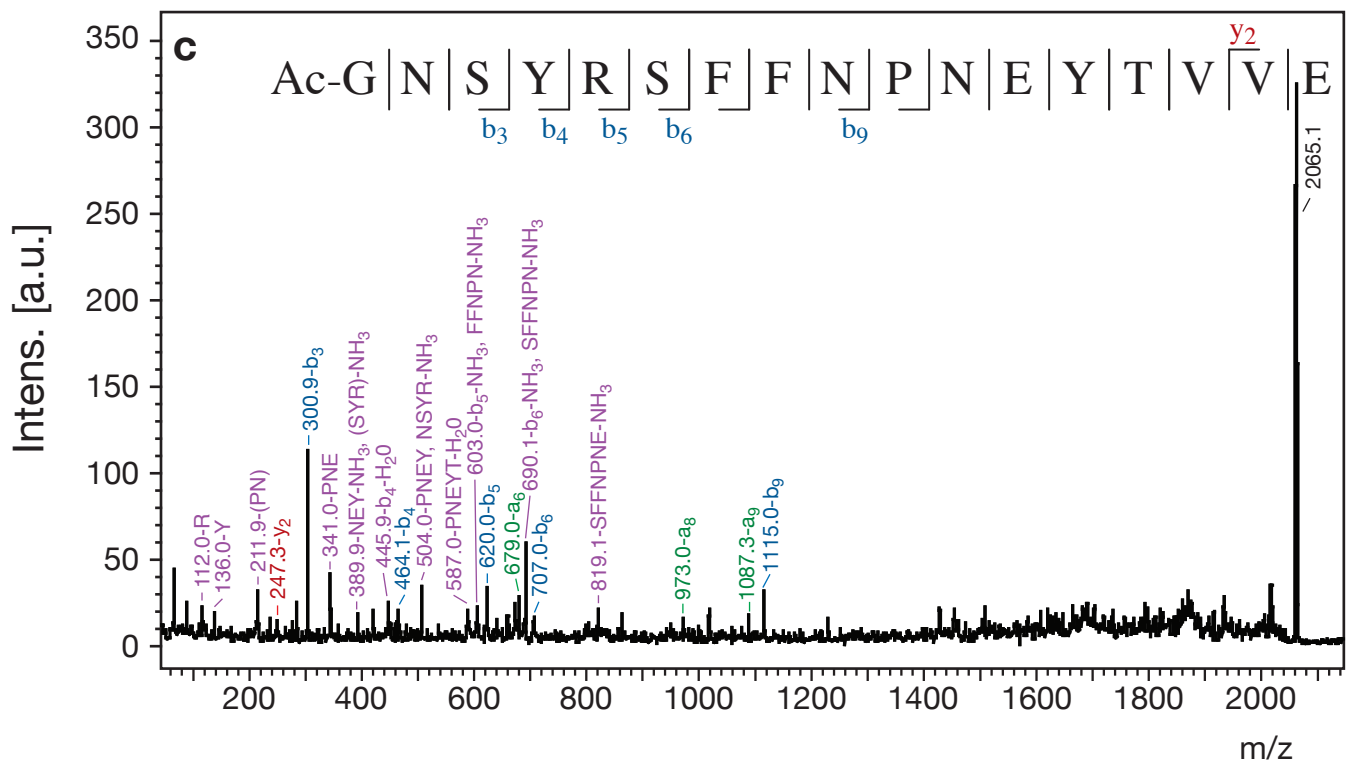

Supplementary Figure S3. MS/MS from ALA of 3 *afp-13* peptides (see also Figure 5). Peaks representing a (green), b (blue), y (red), and high intensity internal fragment (purple) ions are labeled and b and y ions are summarized at the top of each spectrum. (a) MS/MS spectrum of AF35, m/z 1815.8. (b) MS/MS spectrum of PepTL, m/z 1544.5. (c) MS/MS spectrum of PepGE+Ac, m/z 2065.1.

Supplementary Figure S4.

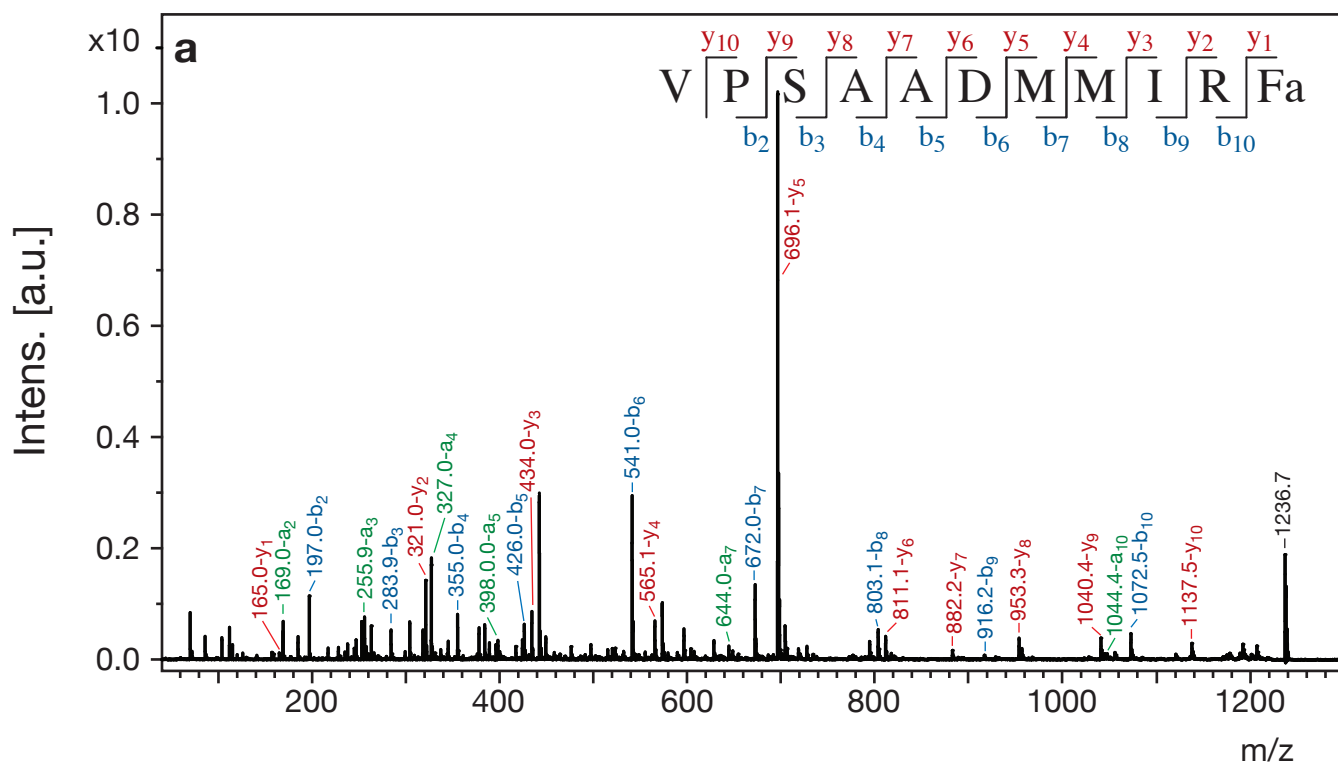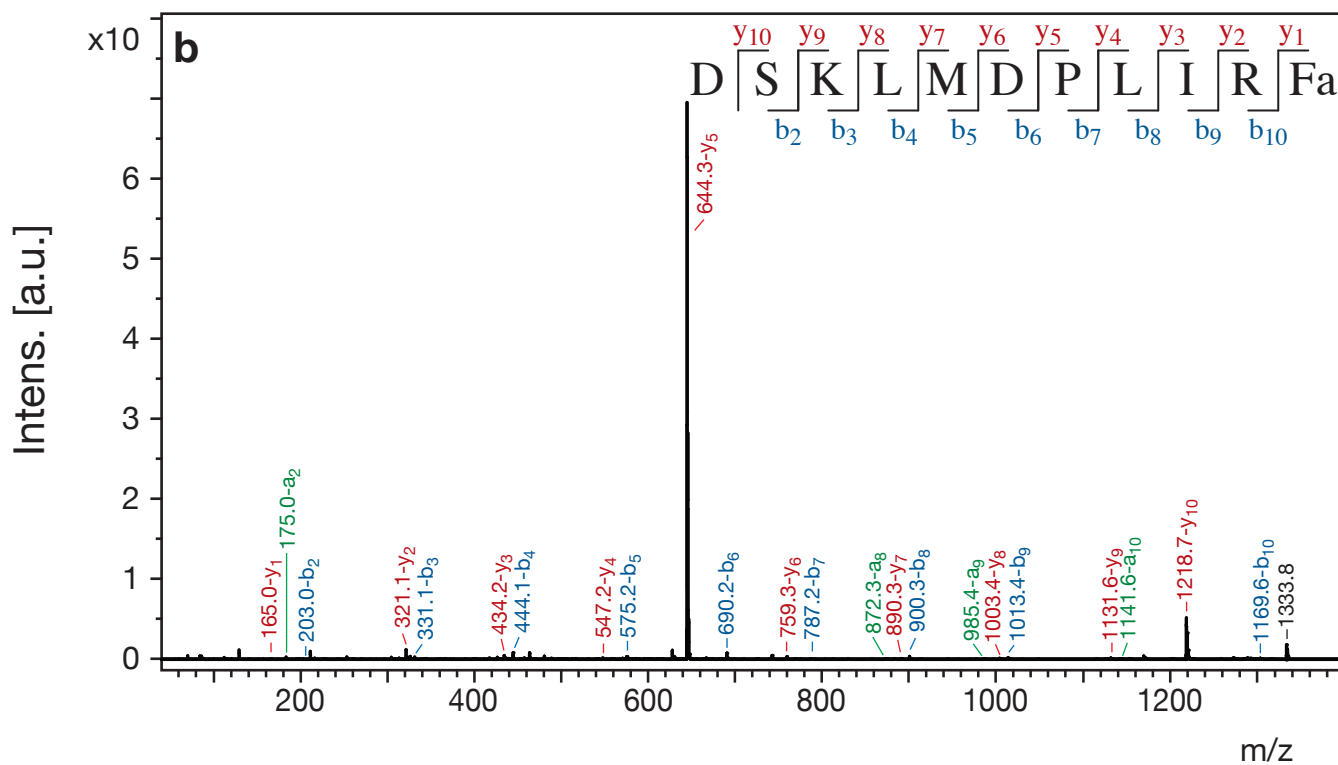

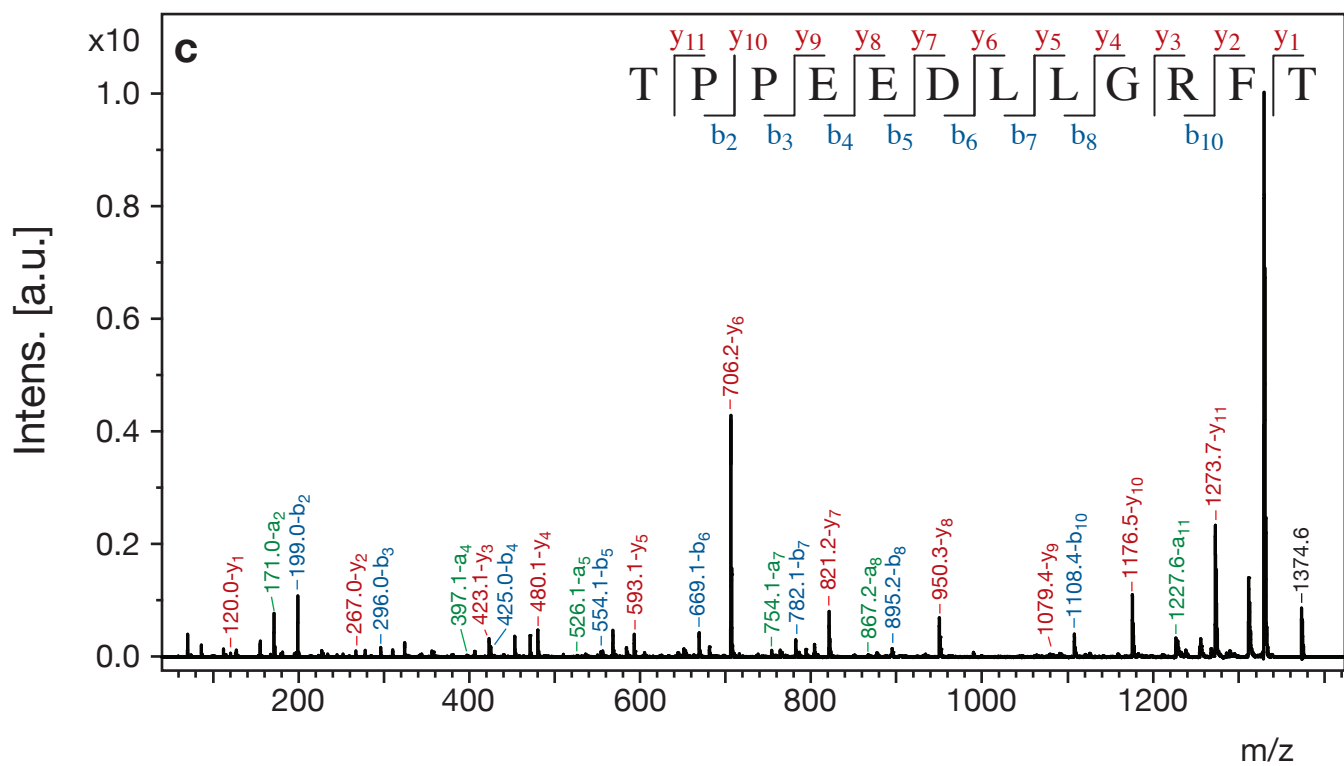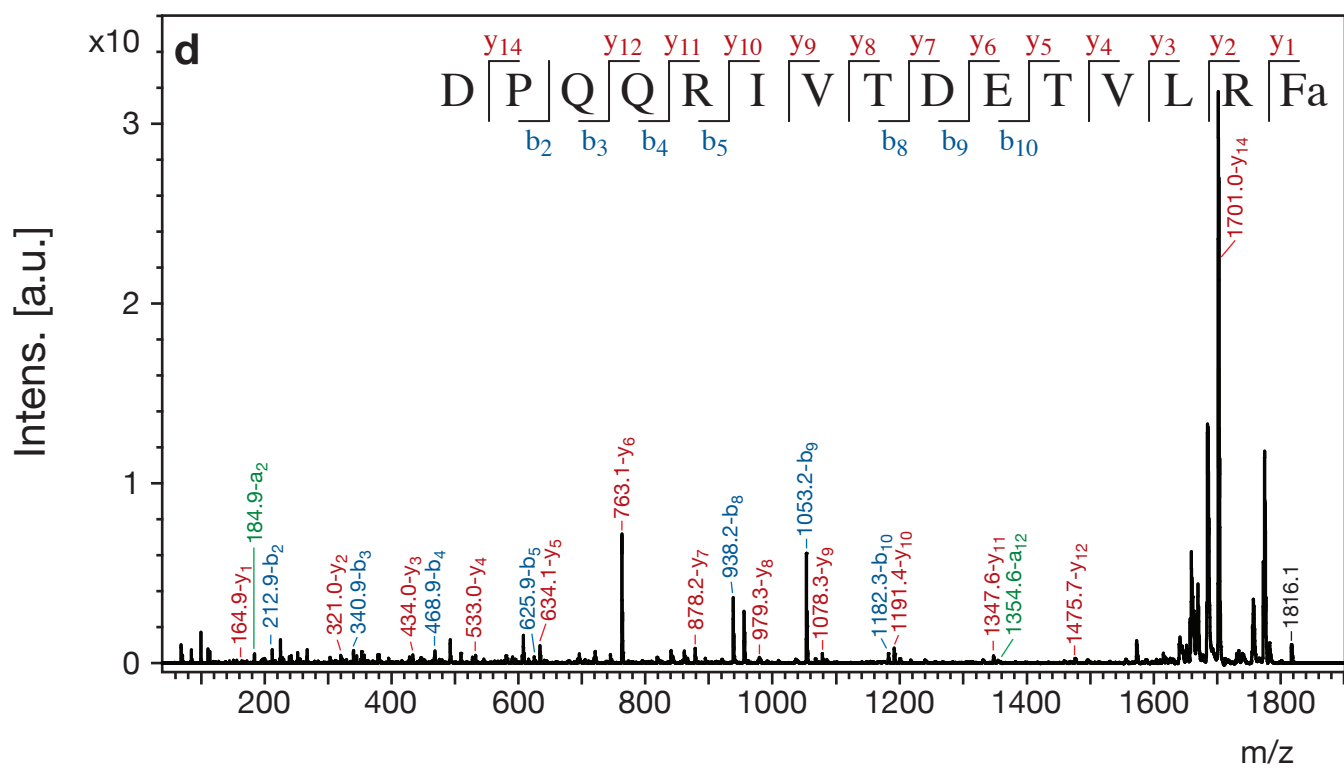

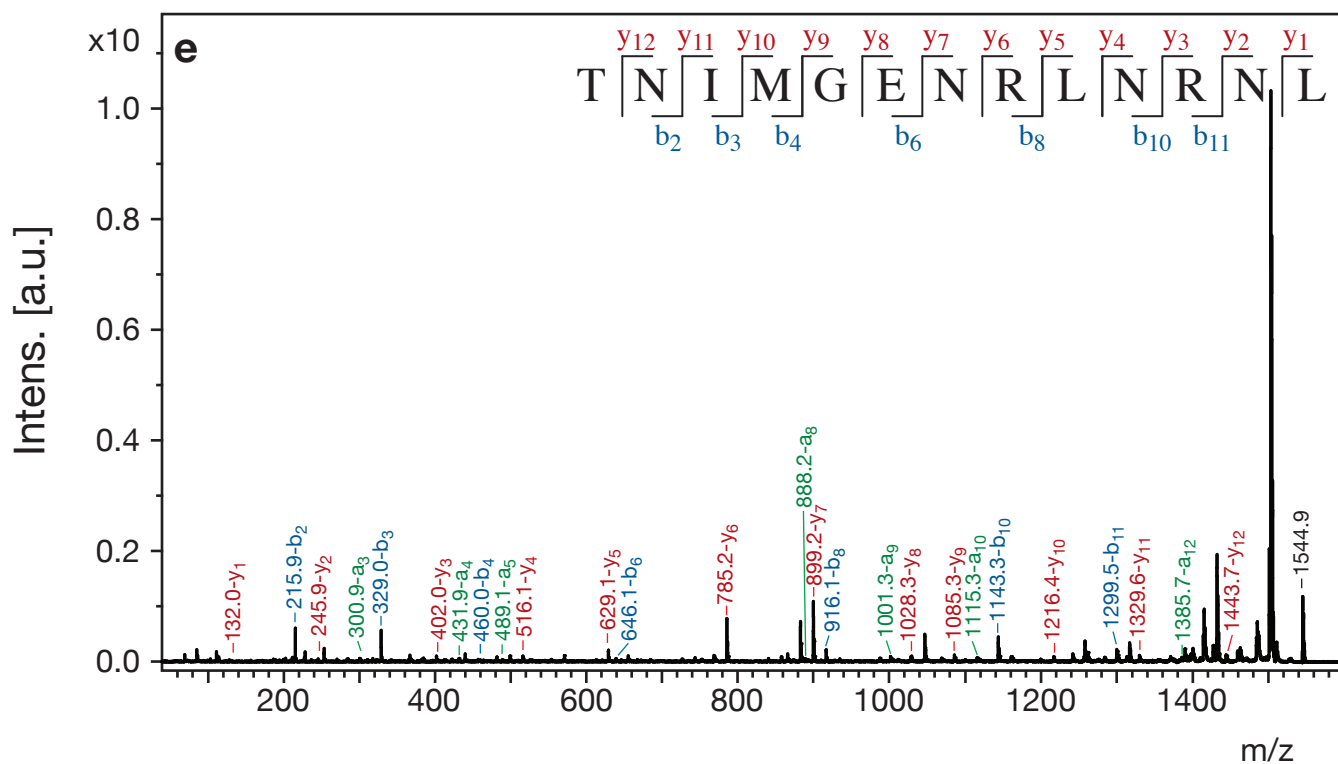

Supplementary Figure S4. MS/MS of synthetic novel peptides. (a) MS/MS spectrum of AF36, m/z 1236.7. (b) MS/MS spectrum of AF34, m/z 1333.8. (c) MS/MS spectrum of PepTT, m/z 1374.6. (d) MS/MS spectrum of AF35, m/z 1816.1. (e) MS/MS spectrum of PepTL, m/z 1544.9.
